# Supplementary material for: Coordination polymers fabricated from Cd(NO3)2andN,N′,O-pincer-type isonicotinoylhydrazone-based polytopic ligands – an insight from experimental and theoretical investigations
Source: Royal Society of Chemistry journal article supplement (doi:10.1039/d2ce00294a), 2022-01-01
Supplement: d2ce00294a1.pdf [file d2ce00294a1.pdf]

# Electronic Supplementary Information

## Coordination polymers fabricated from $\text{Cd}(\text{NO}_3)_2$ and $N,N',O$ -pincer type isonicotinoylhydrazone based polytopyc ligands – an insight from experimental and theoretical investigations

Ghodrat Mahmoudi,<sup>\*a</sup> Farhad Akbari Afkhami,<sup>b</sup> Ali Akbar Khandar,<sup>c</sup> Jonathan M. White,<sup>d</sup> Waldemar Maniukiewicz,<sup>\*e</sup> Maria G. Babashkina,<sup>f</sup> Mariusz P. Mitoraj,<sup>\*g</sup> Filip Sagan<sup>g</sup> and Damir A. Safin<sup>\*fhi</sup>

<sup>a</sup> Department of Chemistry, Faculty of Science, University of Maragheh, P.O. Box 55181-83111, Maragheh, Iran. E-mail: ghodratmahmoudi@gmail.com

<sup>b</sup> Department of Chemistry, The University of Alabama, Box 870336, 250 Hackberry Lane, Tuscaloosa, Alabama 35487, USA

<sup>c</sup> Department of Inorganic Chemistry, Faculty of Chemistry, University of Tabriz, 51666-16471, Tabriz, Iran

<sup>d</sup> BIO-21 Molecular Science and Biotechnology, University of Melbourne, Parkville, Victoria 3052, Australia

<sup>e</sup> Institute of General and Ecological Chemistry, Lodz University of Technology, Żeromskiego 116, 90-924 Łódź, Poland. E-mail: waldemar.maniukiewicz@p.lodz.pl

<sup>f</sup> Advanced Materials for Industry and Biomedicine laboratory, Kurgan State University, Sovetskaya Str. 63/4, 640020 Kurgan, Russian Federation. E-mail: damir.a.safin@gmail.com

<sup>g</sup> Department of Theoretical Chemistry, Faculty of Chemistry, Jagiellonian University, R. Gronostajowa 2, 30-387 Cracow, Poland. E-mail: mitoraj@chemia.uj.edu.pl

<sup>h</sup> Innovation Center for Chemical and Pharmaceutical Technologies, Ural Federal University named after the First President of Russia B.N. Yeltsin, Mira Str. 19, Ekaterinburg, 620002, Russian Federation

<sup>i</sup> University of Tyumen, Volodarskogo Str. 6, 625003 Tyumen, Russian Federation

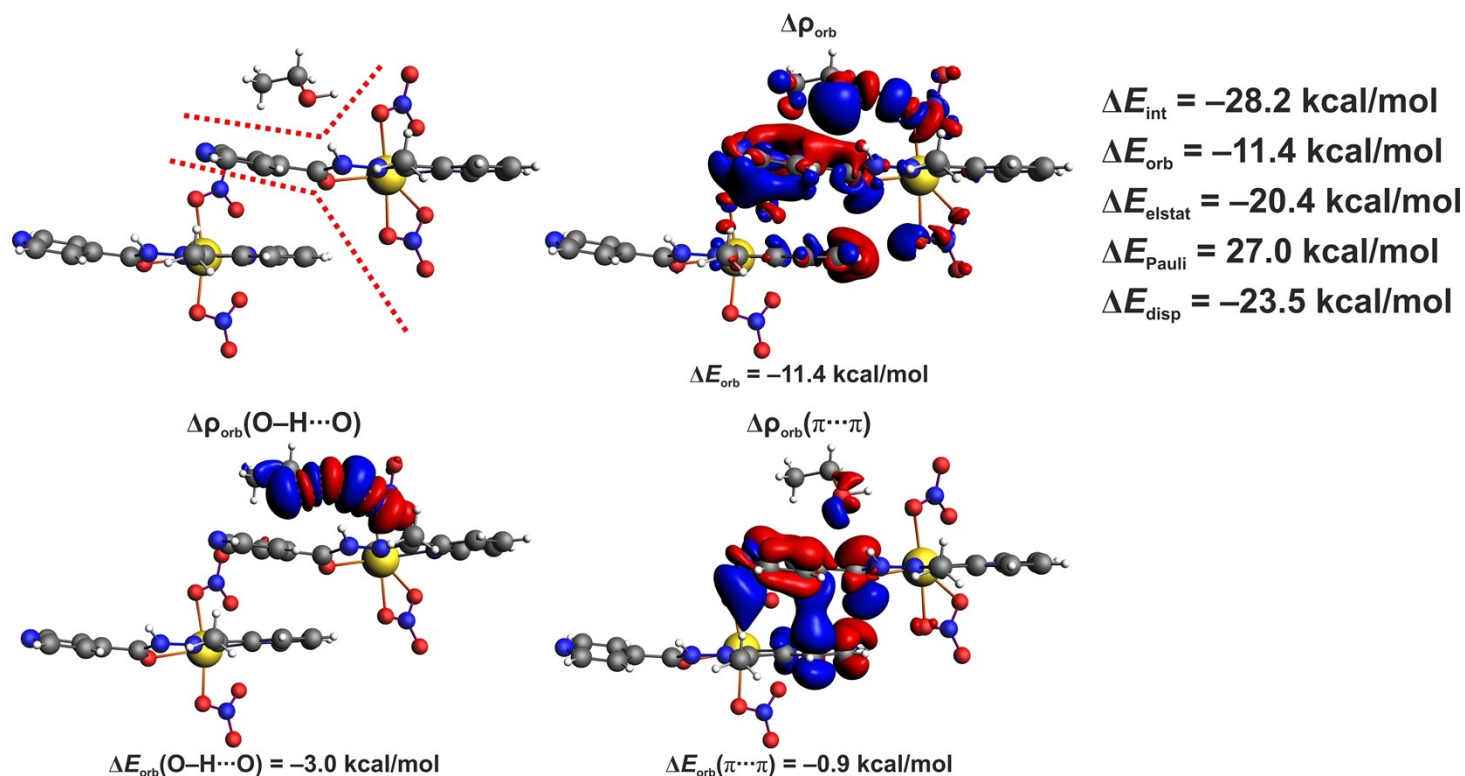

**Fig. S1** ETS-NOCV energy decomposition results for the cluster model of **2**. (top) The considered model including fragmentation pattern, ETS based results, overall deformation density  $\Delta\rho_{\text{orb}}$  with the corresponding energy  $\Delta E_{\text{orb}}$ . (bottom) The constituting NOCVs based deformation density contributions  $\Delta\rho_{\text{orb}}(i)$  with the corresponding energies  $\Delta E_{\text{orb}}(i)$ .

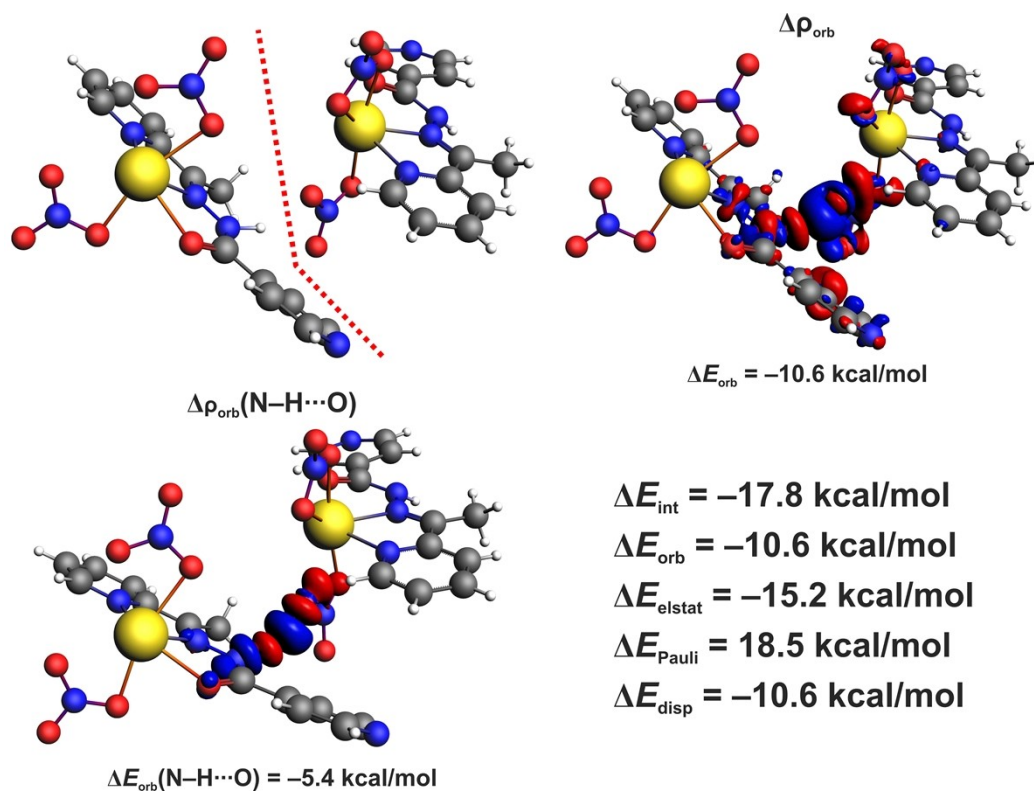

**Fig. S2** ETS-NOCV energy decomposition results for the cluster model of **2**. (top) The considered model including fragmentation pattern, ETS based results, overall deformation density  $\Delta\rho_{\text{orb}}$  with the corresponding energy  $\Delta E_{\text{orb}}$ . (bottom) The constituting NOCVs based deformation density contributions  $\Delta\rho_{\text{orb}}(i)$  with the corresponding energies  $\Delta E_{\text{orb}}(i)$ .

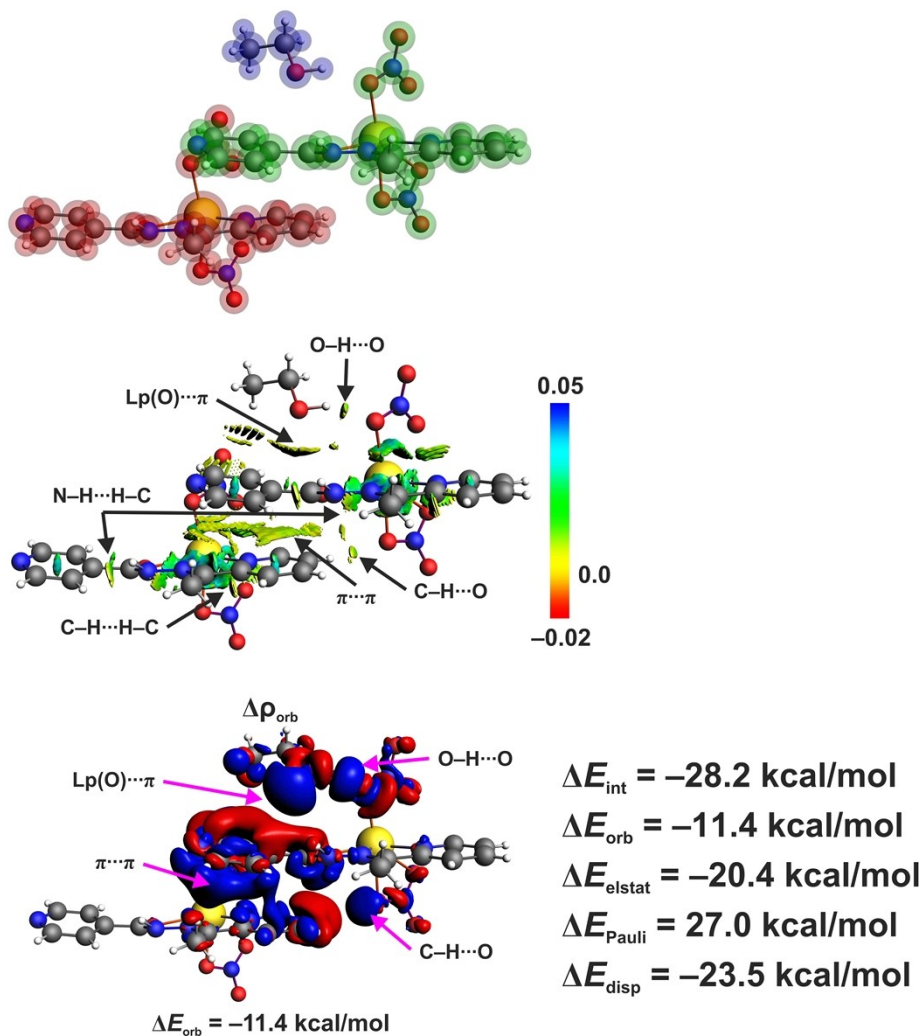

**Fig. S3** ETS-NOCV energy decomposition results for the cluster model of **2**. (top) The considered model, (middle) NCI contour plot and (bottom) overall deformation density  $\Delta\rho_{\text{orb}}$  with the corresponding energy  $\Delta E_{\text{orb}}$ .

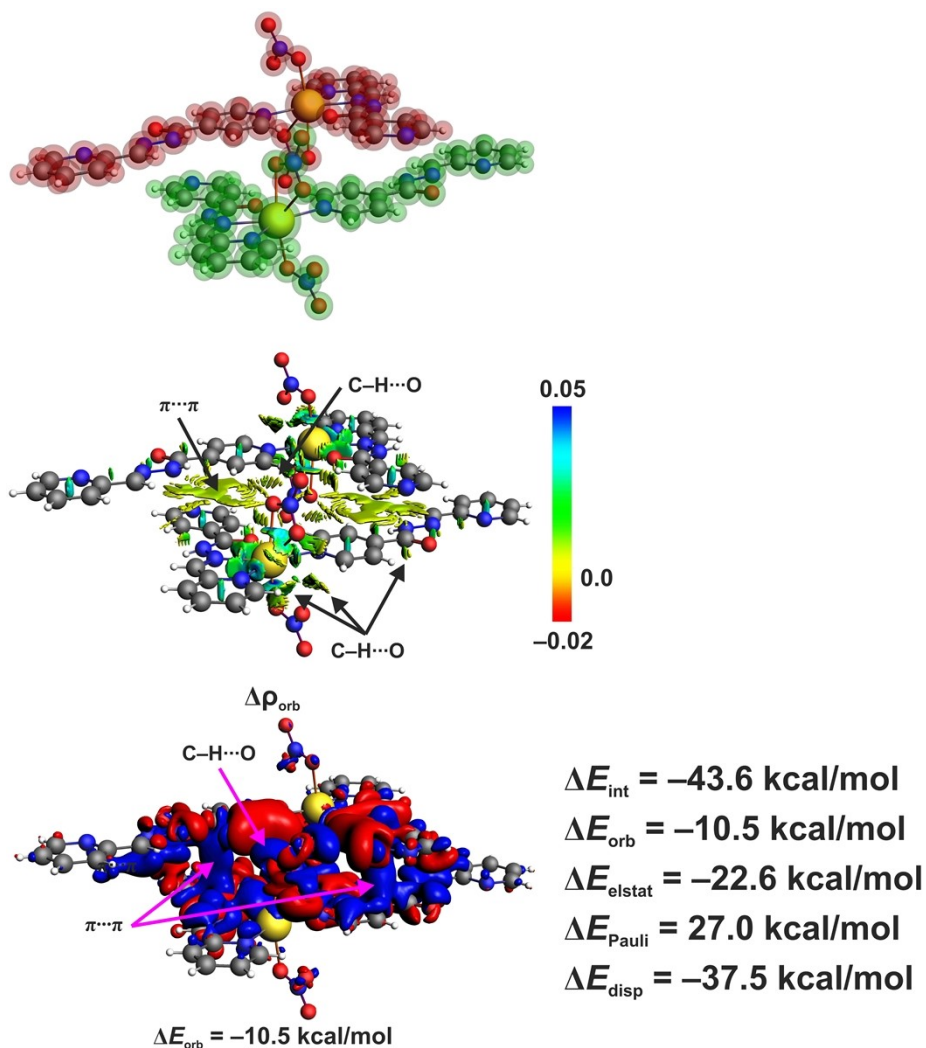

**Fig. S4** ETS-NOCV energy decomposition results for the cluster model of **1**. (top) The considered model, (middle) NCI contour plot and (bottom) overall deformation density  $\Delta\rho_{\text{orb}}$  with the corresponding energy  $\Delta E_{\text{orb}}$ .

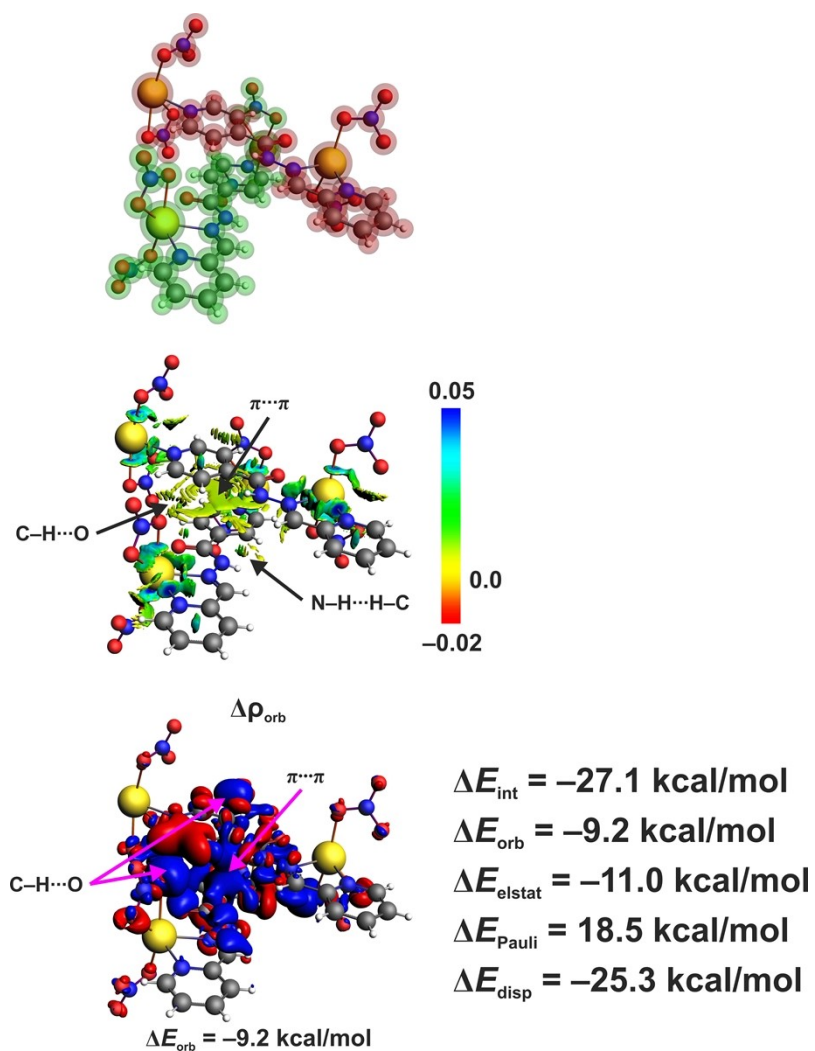

**Fig. S5** ETS-NOCV energy decomposition results for the cluster model of **1**. (top) The considered model, (middle) NCI contour plot and (bottom) overall deformation density  $\Delta\rho_{\text{orb}}$  with the corresponding energy  $\Delta E_{\text{orb}}$ .

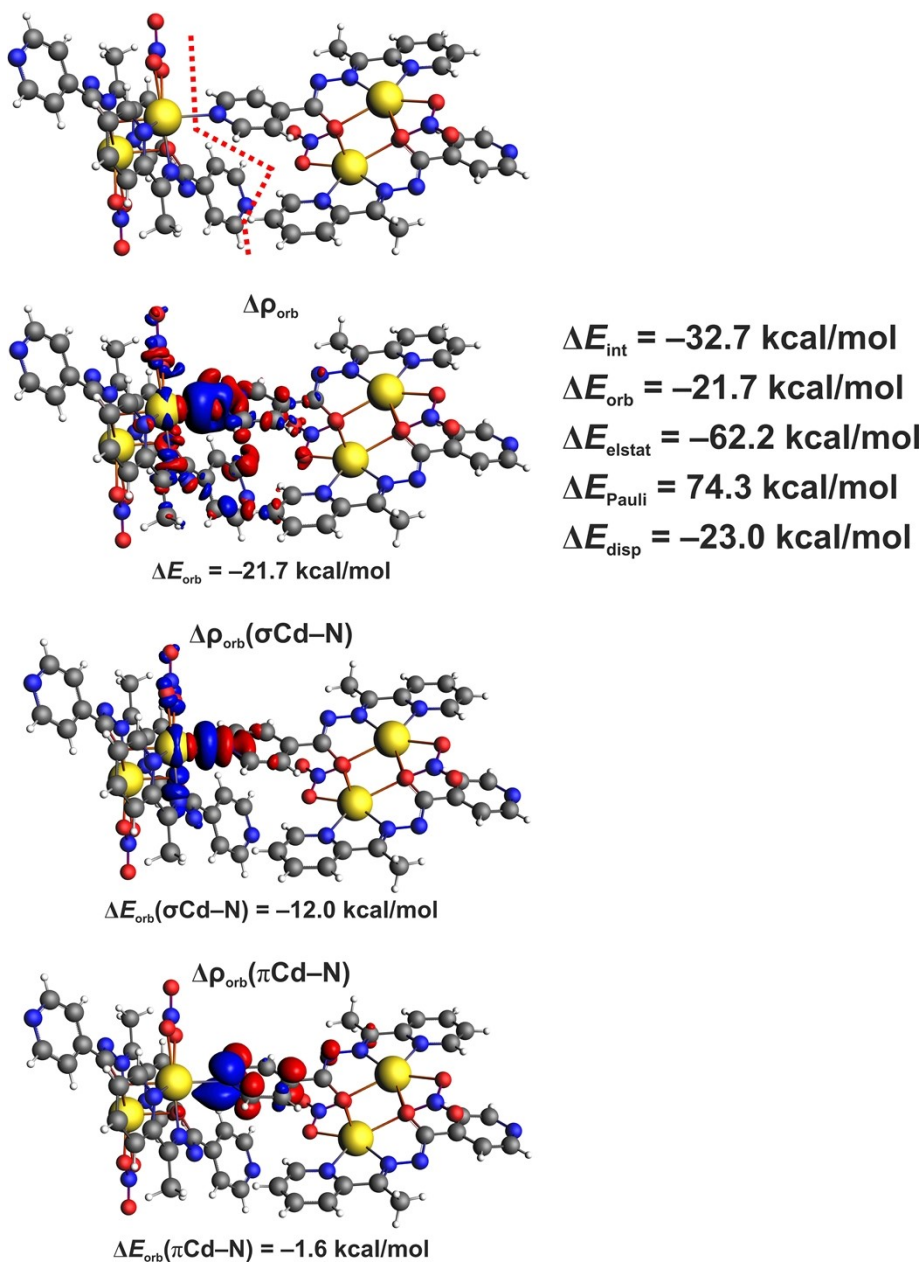

**Fig. S6** ETS-NOCV energy decomposition results, describing the Cd-N bond in the cluster model of **3**. (top) ETS based results, overall deformation density  $\Delta\rho_{\text{orb}}$  with the corresponding energy  $\Delta E_{\text{orb}}$ . (bottom) The constituting NOCVs based deformation density contributions  $\Delta\rho_{\text{orb}}(i)$  with the corresponding energies  $\Delta E_{\text{orb}}(i)$ .

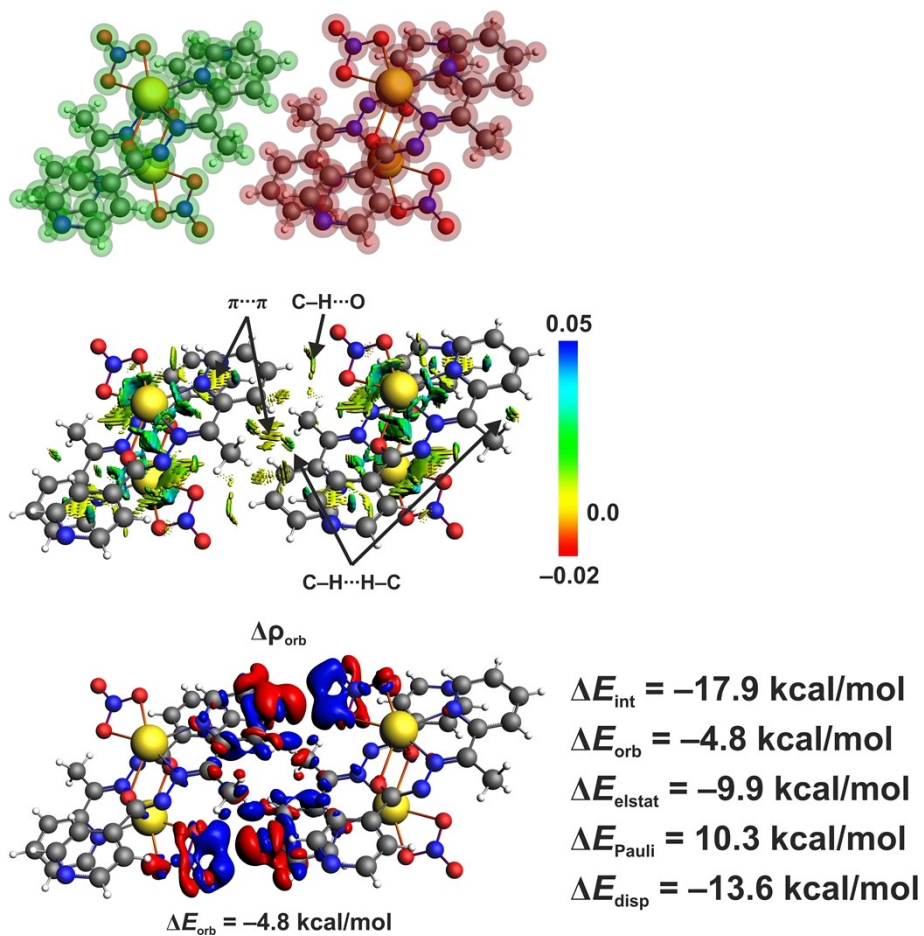

**Fig. S7** ETS-NOCV energy decomposition results for the cluster model of **3**. (top) The considered model, (middle) NCI contour plot and (bottom) overall deformation density  $\Delta\rho_{\text{orb}}$  with the corresponding energy  $\Delta E_{\text{orb}}$ .
